# Supplementary material for: Constitutive, Basal, and β-Alanine-Mediated Activation of the Human Mas-Related G Protein-Coupled Receptor D Induces Release of the Inflammatory Cytokine IL-6 and Is Dependent on NF-κB Signaling
Source: MDPI journal article supplement (doi:10.3390/ijms222413254), 2021-12-09
Supplement: s1 [file s1]

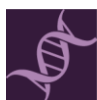

## Supplementary Material

### 1.1 $\beta$ -Alanine-Mediated Activation of MRGPRD Induces Release of IL-6 from HT1080 cells

HT1080 cells were cultured in 100 mm dishes using DMEM supplemented with 10% FBS and 1% penicillin-streptomycin (incubator setting, 37°C with 5% CO<sub>2</sub>). HT1080 cells were collected by trypsinization and  $2.5 \times 10^5$  cells/well were seeded in a 6 well cell culture plate. After 16 h, medium was removed, and cells were washed once with 1 ml phosphate-buffered saline (PBS). Cells were transfected with 2  $\mu$ g plasmid cDNA (i.e. pCMV-GS or pCMV-MRGPRD-HA) using Lipofectamine 2000 as per the manufacturer's instructions. After 4 h, transfection medium was replaced with 2 mL DMEM supplemented with 10% FBS and 1% penicillin-streptomycin and the plate was returned to the incubator. 24 h later, medium was removed and replaced with 2 mL DMEM to incubate the cells overnight in medium without serum (starvation step). Next day, after 24 h, i.e., 48 h from transfection, cells were washed once with 1 ml PBS and 2 mL DMEM was added to each well containing either vehicle control (percentage of milli-Q was 0.2%) or  $\beta$ -alanine (dissolved in milli-Q; 0.2%). The final concentration of  $\beta$ -alanine was 100  $\mu$ M. After treatment, the plate was returned to the incubator for another 24 h incubation. Subsequently, i.e., 72 h post-transfection, cell supernatant medium was collected in a 2 ml microcentrifuge tube and spun at 1000 g for 5 min at 4 °C to pellet down debris. The supernatant medium was transferred to a fresh microcentrifuge tube and stored at -80°C until assayed by ELISA. For IL-6 assessment the collected supernatant medium was thawed on ice and sample was diluted (1:100 and 1:10) in assay diluent buffer and IL-6 estimation was performed using an IL-6 ELISA (R&D Systems; Cat# D6050) kit as per the manufacturer's instructions. The calculated IL-6 concentrations from collected supernatant medium were represented as ng/mL (Figure S1).

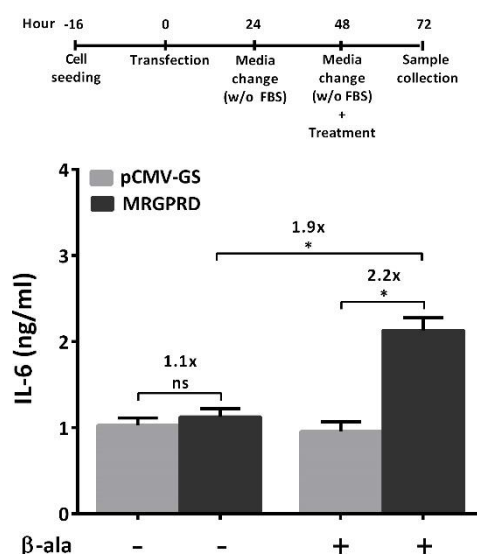

Figure S1. Activation of MRGPRD mediates IL-6 release in HT1080 cells. HT1080 cells transiently expressing empty vector (pCMV-GS) or MRGPRD-HA receptor were stimulated with either  $\beta$ -alanine (100  $\mu$ M; final concentration/well) or vehicle control. A significant, 1.9-fold higher release of IL-6 was observed from MRGPRD-expressing cells treated with  $\beta$ -alanine as compared to vehicle-treated. Also, IL-6 levels of  $\beta$ -alanine treated MRGPRD-expressing cells were nearly 2.2-fold higher than those of empty vector expressing control cells. The IL-6 release is represented in ng/ml (average of  $n = 2$  experiments). All values are represented as the mean  $\pm$  s.e.m. Statistical significance was determined using one-way analysis of variance (ANOVA) and Sidak's post hoc test was applied for multiple comparisons. \*  $P \leq 0.05$  was considered significant and 'ns' is non-significant.

### 1.2 $\beta$ -Alanine-Mediated Activation of MRGPRD Induces IP1 Accumulation in HeLa cells

HeLa (mock) cells and HeLa cells stably expressing MRGPRD-NLuc (with 1000  $\mu$ g/ml Geneticin) were cultured in 100 mm dishes using DMEM supplemented with 10% FBS and 1% penicillin-streptomycin (37 °C with 5% CO<sub>2</sub>). The cells were collected by trypsinization and  $2 \times 10^4$  cells/well were seeded in 96 white, flat, opaque bottom well plate (CELLSTAR; Cat# 655083). 24 h post seeding, the medium was removed and replaced with 100  $\mu$ L DMEM for overnight starvation. The next day, i.e., 48 h from seeding, the medium was replaced with 100  $\mu$ L stimulation buffer (without  $\beta$ -alanine) containing either vehicle control (final concentration of DMSO was 0.1%) or desired concentration of inhibitor (dissolved in DMSO; 0.1%), and plate was kept in incubator for 1 h. Post-incubation, cells were stimulated with 40  $\mu$ L stimulation buffer containing vehicle control (DMSO; 0.1%) or inhibitor (dissolved in DMSO; 0.1%) with vehicle control (percentage of milli-Q was 0.1%) or  $\beta$ -alanine (dissolved in milli-Q; 0.1%). The final concentration of  $\beta$ -alanine was 1 mM/well. Plate was then returned to the incubator (37 °C with 5% CO<sub>2</sub>) for 1 h. Afterwards 30  $\mu$ L of donor (IP1- cryptate antibody) and 30  $\mu$ L acceptor (IP1-d2) was added to wells as per the manufacturer's instructions (Cisbio; IP-One-Gq HTRF assay). The plate was incubated at 25 °C for 1 h, subsequently read using an EnVision multimode plate reader. Using standard curve, HTRF ratios were converted into IP1 concentration in nM. The relative fold change ( $\Delta F$ ) was obtained by normalizing IP1 to that of its respective control. The fold-change ( $\Delta F$ ) was further normalized to the  $\Delta F$  of  $\beta$ -alanine-stimulated MRGPRD-expressing cells (i.e.,  $\Delta F_{\max}$ ) and expressed as percentage.

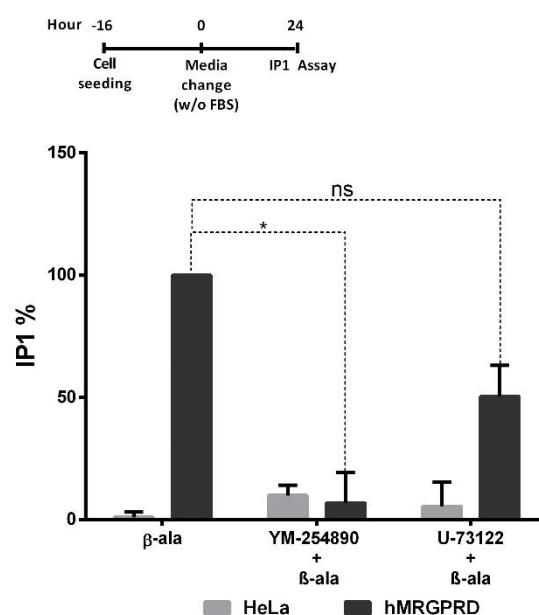

Figure S2. Activation of MRGPRD increased inositol monophosphate (IP1) accumulation in HeLa cells. HeLa (mock) and HeLa cells stably expressing MRGPRD-NLuc were pre-treated with either vehicle control or the G $\alpha_q$  inhibitor (YM-254890; 10  $\mu$ M) or the pan-PLC inhibitor (U-73122; 10  $\mu$ M) for 1 h before being stimulated with  $\beta$ -alanine (1mM).  $\beta$ -alanine-stimulated MRGPRD-expressing HeLa cells induced IP1 accumulation. No induction was observed in cells pre-treated with G $\alpha_q$  inhibitor, whereas partial reduction was observed for pan-PLC inhibitor. The IP1 accumulation is represented in percentage of  $\Delta F/F_{\max}$  (average of  $n = 2$  experiments). All values are represented as the mean  $\pm$  s.e.m. Statistical significance was determined using one-way analysis of variance (ANOVA) and Sidak's post hoc test was applied for multiple comparisons. \*  $P \leq 0.05$  was considered significant and 'ns' is non-significant.
